# Supplementary material for: One-step synthesis of bifunctional iron-doped manganese oxide nanorods for rechargeable zinc–air batteries
Source: Royal Society of Chemistry journal article supplement (doi:10.1039/c8cy02498g), 2019-01-01
Supplement: c8cy02498g1.pdf [file c8cy02498g1.pdf]

Supporting Information

**One Step Synthesis of Bifunctional Iron doped Manganese oxide Nanorods  
for Rechargeable Zinc Air Battery**

Ankita Mathur<sup>1</sup>, Aditi Halder\*<sup>2</sup>

<sup>1</sup>School of Engineering, Indian Institute of Technology Mandi, Mandi, HP, India

<sup>2</sup>School of Basic Sciences, Indian Institute of Technology Mandi, Mandi, HP, India

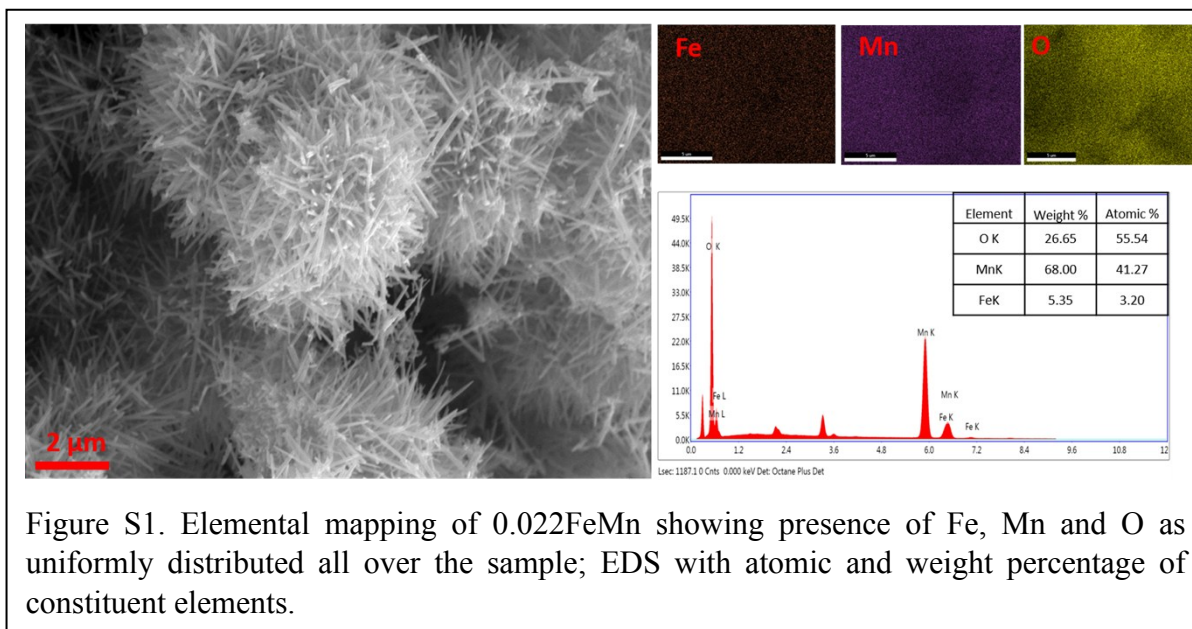

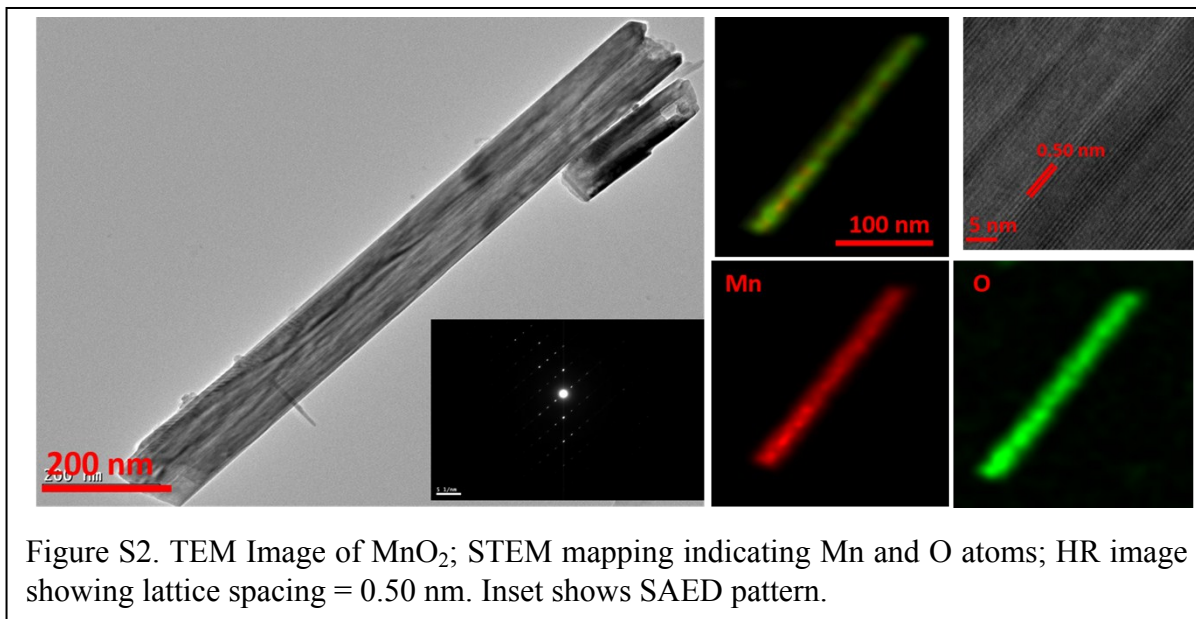

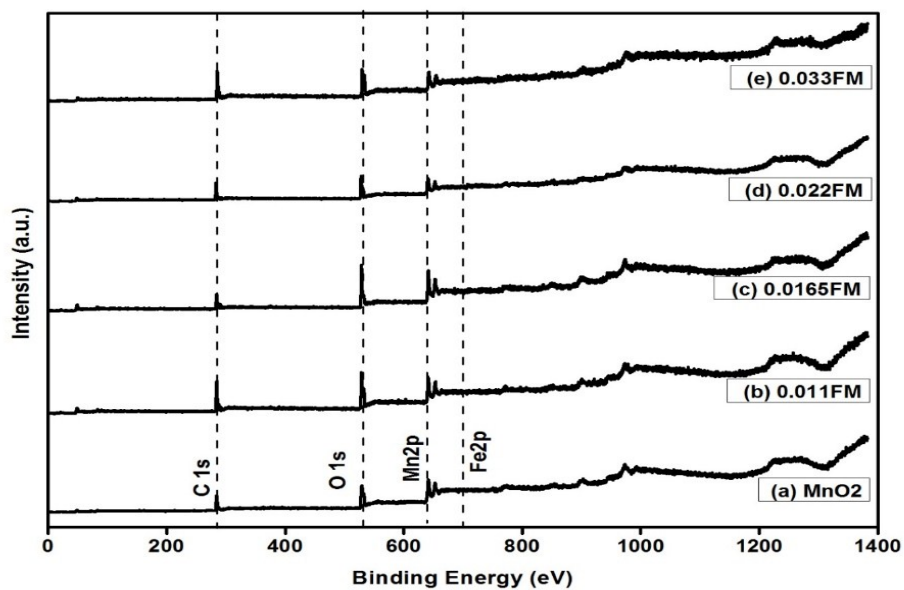

Figure S3. XPS Analysis: Survey scan spectrum of doped and undoped MnO<sub>2</sub>.

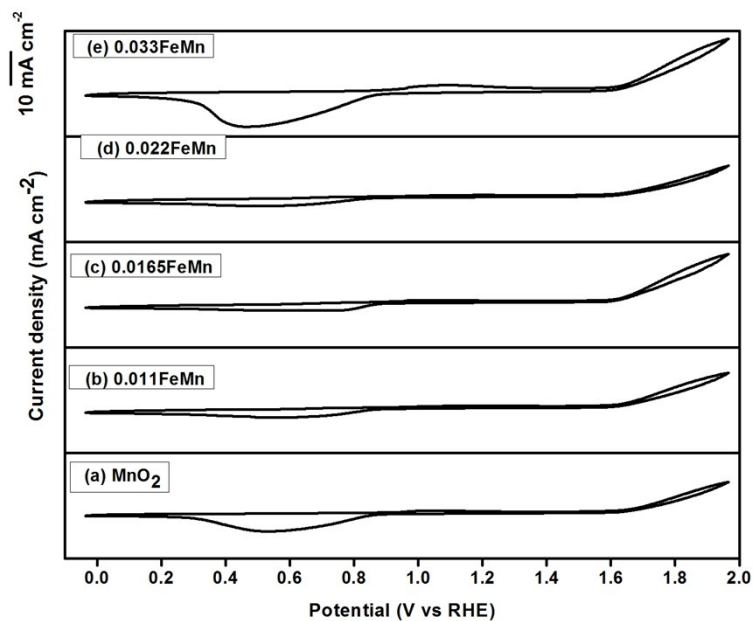

Figure S4. Cyclic voltammograms of doped and undoped MnO<sub>2</sub> in O<sub>2</sub> saturated 0.1 M KOH electrolyte.

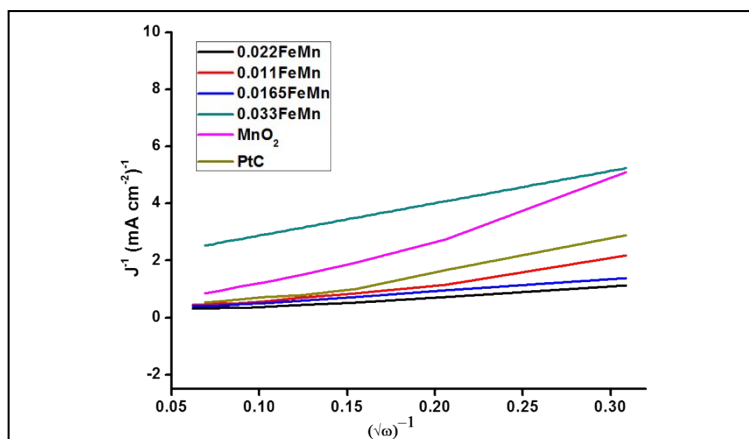

Figure S5. K-L plot drawn at 0.45 V (vs RHE) in O<sub>2</sub> saturated 0.1 M KOH electrolyte.

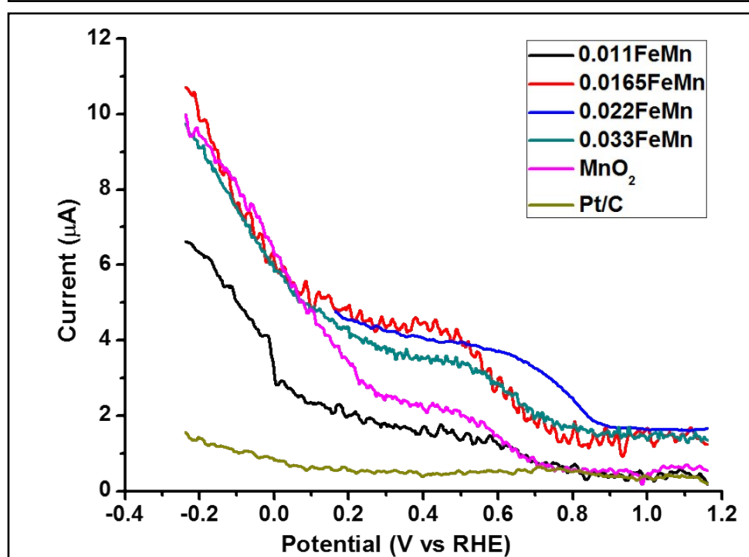

Figure S6. RRDE plots at 1600 rpm in O<sub>2</sub> saturated 0.1 M KOH electrolyte indicating formation of negligible amount of intermediate.

Table 1. BET surface area and BJH pore diameter

|                  | D <sub>pore</sub> (nm) | S <sub>BET</sub> (m <sup>2</sup> .g <sup>-1</sup> ) |
|------------------|------------------------|-----------------------------------------------------|
| 0.011FeMn        | <1 nm                  | 136.661                                             |
| 0.0165FeMn       | <1 nm                  | 198.566                                             |
| 0.022FeMn        | <1 nm                  | 198.689                                             |
| 0.033FeMn        | <1 nm                  | 135.733                                             |
| MnO <sub>2</sub> | 1-5 nm                 | 95.835                                              |

Table 2 Comparison of at.% from XPS and EDS

| Sample Name |      | At. % O | At.% Mn | At. % Fe |
|-------------|------|---------|---------|----------|
| 0.011FeMn   | EDAX | 43.46   | 54.74   | 1.81     |
|             | XPS  | 82.86   | 16.93   | 0.21     |
| 0.0165FeMn  | EDAX | 45.36   | 52.00   | 2.64     |
|             | XPS  | 72.10   | 24.46   | 3.44     |
| 0.022FeMn   | EDAX | 55.54   | 41.27   | 3.20     |
|             | XPS  | 76.77   | 15.78   | 7.45     |
| 0.033FeMn   | EDAX | 57.83   | 38.74   | 3.42     |
|             | XPS  | 81.73   | 15.38   | 2.89     |

Table 3. RRDE calculation

|                        | <b>n (@0.45 V vs RHE)</b> | <b>% HO<sub>2</sub><sup>-</sup> (@0.45 V vs RHE)</b> |
|------------------------|---------------------------|------------------------------------------------------|
| <b>Pt/C</b>            | 3.97                      | 1.70                                                 |
| <b>MnO<sub>2</sub></b> | 3.91                      | 4.68                                                 |
| <b>0.011FeMn</b>       | 3.90                      | 4.80                                                 |
| <b>0.0165FeMn</b>      | 3.84                      | 7.84                                                 |
| <b>0.022FeMn</b>       | 3.91                      | 4.35                                                 |
| <b>0.033FeMn</b>       | 3.82                      | 8.93                                                 |
